# Supplementary material for: SARS-CoV-2 Variants Associated with Vaccine Breakthrough in the Delaware Valley through Summer 2021
Source: PubMed Central journal article supplement (PMC8942461; doi:10.1128/mbio.03788-21), 2022-02-08
Supplement: mbio.03788-21-st002.pdf [file mbio.03788-21-st002.pdf]

**Table S2: Nomenclature of Variants Being Monitored and Variants of Concern**

| <b><u>Pango Lineage</u></b> | <b><u>WHO Designation</u></b> | <b><u>VBM/VOC</u></b> | <b><u>Location of First Identification</u></b> |
|-----------------------------|-------------------------------|-----------------------|------------------------------------------------|
| B.1.1.7                     | Alpha                         | VBM                   | United Kingdom                                 |
| Q.1                         | Alpha                         | VBM                   |                                                |
| Q.4                         | Alpha                         | VBM                   |                                                |
| Q.6                         | Alpha                         | VBM                   |                                                |
| B.1.351                     | Beta                          | VBM                   | South Africa                                   |
| P.1                         | Gamma                         | VBM                   | Brazil/Japan                                   |
| P.1.10                      | Gamma                         | VBM                   |                                                |
| P.1.2                       | Gamma                         | VBM                   |                                                |
| B.1.427                     | Epsilon                       | VBM                   | California, USA                                |
| B.1.429                     | Epsilon                       | VBM                   | California, USA                                |
| B.1.525                     | Eta                           | VBM                   | United Kingdom/Nigeria                         |
| B.1.526                     | Iota                          | VBM                   | New York, USA                                  |
| B.1.617.1                   | Kappa                         | VBM                   | India                                          |
| B.1.621                     | Mu                            | VBM                   | Columbia                                       |
| B.1.621.1                   | Mu                            | VBM                   |                                                |
| P.2                         | Zeta                          | VBM                   | Brazil                                         |
| B.1.617.2                   | Delta                         | VOC                   | India                                          |
| AY.1                        | Delta                         | VOC                   |                                                |
| AY.10                       | Delta                         | VOC                   |                                                |
| AY.12                       | Delta                         | VOC                   |                                                |
| AY.13                       | Delta                         | VOC                   |                                                |
| AY.14                       | Delta                         | VOC                   |                                                |
| AY.15                       | Delta                         | VOC                   |                                                |
| AY.19                       | Delta                         | VOC                   |                                                |
| AY.2                        | Delta                         | VOC                   |                                                |
| AY.20                       | Delta                         | VOC                   |                                                |
| AY.21                       | Delta                         | VOC                   |                                                |
| AY.24                       | Delta                         | VOC                   |                                                |
| AY.25                       | Delta                         | VOC                   |                                                |
| AY.3                        | Delta                         | VOC                   |                                                |
| AY.3.1                      | Delta                         | VOC                   |                                                |
| AY.4                        | Delta                         | VOC                   |                                                |
| AY.5                        | Delta                         | VOC                   |                                                |
| AY.6                        | Delta                         | VOC                   |                                                |
