# Supplementary material for: SARS-CoV-2 Variants Associated with Vaccine Breakthrough in the Delaware Valley through Summer 2021
Source: PubMed Central journal article supplement (PMC8942461; doi:10.1128/mbio.03788-21), 2022-02-08
Supplement: mbio.03788-21-st003.pdf [file mbio.03788-21-st003.pdf]

Table S3 Estimated fold enrichment in odds of appearing in the spike gene target failu

|             | Mean | Lower 95% CrI | Upper 95% CrI |
|-------------|------|---------------|---------------|
| B.1.1.7     | 120  | 38            | 470           |
| Other Alpha | 0.93 | 0.046         | 14            |
| Other Beta  | 0.91 | 0.05          | 12            |
| AY.12       | 1    | 0.049         | 18            |
| AY.14       | 0.99 | 0.048         | 20            |
| AY.20       | 1    | 0.051         | 19            |
| AY.24       | 0.99 | 0.052         | 19            |
| AY.25       | 1    | 0.052         | 19            |
| AY.3        | 0.98 | 0.048         | 20            |
| AY.4        | 0.99 | 0.051         | 19            |
| B.1.617.2   | 0.97 | 0.048         | 17            |
| Other Delta | 0.98 | 0.052         | 17            |
| B.1.525     | 33   | 1.7           | 380           |
| Other Gamma | 0.9  | 0.045         | 12            |
| P.1         | 0.78 | 0.041         | 7.3           |
| P.1.2       | 0.95 | 0.05          | 15            |
| B.1.526     | 0.39 | 0.018         | 2.4           |
| Other Kappa | 0.97 | 0.05          | 17            |
| B.1         | 0.7  | 0.035         | 5.9           |
| B.1.1       | 0.73 | 0.044         | 5.9           |
| B.1.1.434   | 2.8  | 0.35          | 34            |
| B.1.1.519   | 0.69 | 0.039         | 5.2           |
| B.1.2       | 0.92 | 0.15          | 4.3           |
| B.1.234     | 0.73 | 0.042         | 5.9           |
| B.1.243     | 0.46 | 0.023         | 2.9           |
| B.1.311     | 0.69 | 0.039         | 5.1           |
| B.1.575     | 0.62 | 0.034         | 4.3           |
| B.1.596     | 0.72 | 0.041         | 5.9           |
| B.1.621     | 0.92 | 0.051         | 13            |
| B.1.637     | 0.65 | 0.035         | 4.7           |
| R.1         | 0.65 | 0.036         | 4.8           |
| Other       | 2.3  | 0.49          | 14            |

re set for each SARS-CoV-2 lineage.
