# Supplementary material for: SARS-CoV-2 Variants Associated with Vaccine Breakthrough in the Delaware Valley through Summer 2021
Source: PubMed Central journal article supplement (PMC8942461; doi:10.1128/mbio.03788-21), 2022-02-08
Supplement: mbio.03788-21-st004.pdf [file mbio.03788-21-st004.pdf]

Table S4 Estimated fold enrichment in odds of appearing in vaccine breakthrough san

|             | Mean | Lower 95% CrI | Upper 95% CrI |
|-------------|------|---------------|---------------|
| Delta       | 1.6  | 0.49          | 7             |
| Gamma       | 1.6  | 0.4           | 8.1           |
| Non-VBM/VoC | 0.69 | 0.22          | 1.9           |
| B.1.1.7     | 1.4  | 0.57          | 3.9           |
| Other Alpha | 0.5  | 0.025         | 5.2           |
| Other Beta  | 0.46 | 0.023         | 4             |
| AY.12       | 1.2  | 0.17          | 7.4           |
| AY.14       | 1.4  | 0.19          | 8.9           |
| AY.20       | 0.63 | 0.028         | 5.7           |
| AY.24       | 2    | 0.36          | 12            |
| AY.25       | 1.1  | 0.25          | 4.9           |
| AY.3        | 2.3  | 0.57          | 10            |
| AY.4        | 2.4  | 0.43          | 15            |
| B.1.617.2   | 3    | 0.89          | 11            |
| Other Delta | 0.65 | 0.095         | 3.5           |
| B.1.525     | 0.47 | 0.025         | 2.8           |
| Other Gamma | 0.42 | 0.02          | 3.5           |
| P.1         | 1.5  | 0.43          | 5.2           |
| P.1.2       | 2.8  | 0.49          | 15            |
| B.1.526     | 0.65 | 0.22          | 1.8           |
| Other Kappa | 4.3  | 0.23          | 230           |
| B.1         | 1.1  | 0.14          | 8.8           |
| B.1.1       | 0.43 | 0.02          | 3.8           |
| B.1.1.434   | 0.48 | 0.022         | 4.5           |
| B.1.1.519   | 0.59 | 0.09          | 2.9           |
| B.1.2       | 0.4  | 0.078         | 1.6           |
| B.1.234     | 0.88 | 0.12          | 5.3           |
| B.1.243     | 0.75 | 0.15          | 3.3           |
| B.1.311     | 0.37 | 0.018         | 3             |
| B.1.575     | 0.22 | 0.0095        | 1.6           |
| B.1.596     | 0.38 | 0.019         | 3             |
| B.1.621     | 1.9  | 0.44          | 8.2           |
| B.1.637     | 0.58 | 0.12          | 2.3           |
| R.1         | 0.74 | 0.15          | 3.1           |
| Other       | 0.96 | 0.25          | 3.6           |

amples for each SARS-CoV-2 lineage.
