# Supplementary material for: SARS-CoV-2 Variants Associated with Vaccine Breakthrough in the Delaware Valley through Summer 2021
Source: PubMed Central journal article supplement (PMC8942461; doi:10.1128/mbio.03788-21), 2022-02-08
Supplement: mbio.03788-21-st006.pdf [file mbio.03788-21-st006.pdf]

| Table S6 Estimated fold enrichment in odds of appearing in the spike gene target failure set for each substitution or deletion studied. |        |              |              |             |               |               |
|-----------------------------------------------------------------------------------------------------------------------------------------|--------|--------------|--------------|-------------|---------------|---------------|
| Genomic Position                                                                                                                        | Gene   | Protein      | Mutation     | Mean        | Lower 95% CrI | Upper 95% CrI |
| 820                                                                                                                                     | ORF1ab | Nsp2         | silent_820   | 3.4169831   | 2.223642775   | 4.999581057   |
| 913                                                                                                                                     | ORF1ab | Nsp2         | silent_913   | 110.133251  | 46.12986091   | 248.9815925   |
| 1059                                                                                                                                    | ORF1ab | Nsp2         | T265I        | 0.027341173 | 0.008692578   | 0.056896565   |
| 2110                                                                                                                                    | ORF1ab | Nsp2         | silent_2110  | 5.143735755 | 3.629610544   | 7.045590403   |
| 3037                                                                                                                                    | ORF1ab | Nsp3         | silent_3037  | 0.57863018  | 0.0066219     | 2.593720874   |
| 3267                                                                                                                                    | ORF1ab | Nsp3         | T1001I       | 117.0038585 | 47.64157222   | 269.5812541   |
| 4181                                                                                                                                    | ORF1ab | Nsp3         | A1306S       | 2.453096065 | 0.04548474    | 13.47005686   |
| 5388                                                                                                                                    | ORF1ab | Nsp3         | A1708D       | 81.43221553 | 37.52531916   | 169.174047    |
| 5986                                                                                                                                    | ORF1ab | Nsp3         | silent_5986  | 92.93347711 | 40.91961916   | 199.4979278   |
| 6402                                                                                                                                    | ORF1ab | Nsp3         | P2046L       | 2.567295381 | 0.046084352   | 13.54010167   |
| 6954                                                                                                                                    | ORF1ab | Nsp3         | I2230T       | 81.5124263  | 37.7273632    | 165.9670938   |
| 7042                                                                                                                                    | ORF1ab | Nsp3         | M2259I       | 5.64342404  | 3.614214376   | 8.445288805   |
| 7124                                                                                                                                    | ORF1ab | Nsp3         | P2287S       | 1.473865023 | 0.042935253   | 7.100740171   |
| 8986                                                                                                                                    | ORF1ab | Nsp4         | silent_8986  | 2.521796145 | 0.047590859   | 12.83777315   |
| 9053                                                                                                                                    | ORF1ab | Nsp4         | V2930L       | 1.748502105 | 0.044795588   | 8.550890752   |
| 9867                                                                                                                                    | ORF1ab | Nsp4         | L3201P       | 0.016084657 | 0.000395779   | 0.060730817   |
| 9891                                                                                                                                    | ORF1ab | Nsp4         | A3209V       | 0.106117604 | 0.002467382   | 0.399837717   |
| 10029                                                                                                                                   | ORF1ab | Nsp4         | T3255I       | 0.054541658 | 0.001312743   | 0.201759826   |
| 10319                                                                                                                                   | ORF1ab | 3CL-PRO      | L3352F       | 0.07796607  | 0.015803928   | 0.190407057   |
| 11201                                                                                                                                   | ORF1ab | Nsp6         | T3646A       | 2.142131386 | 0.049184246   | 11.02203797   |
| 11288                                                                                                                                   | ORF1ab | Nsp6         | del_9_11288  | 60.9903687  | 21.03818496   | 159.0248525   |
| 11332                                                                                                                                   | ORF1ab | Nsp6         | silent_11332 | 2.346052737 | 0.049162021   | 12.30247315   |
| 14120                                                                                                                                   | ORF1ab | Pol          | P218L        | 5.600469973 | 3.931735133   | 7.747528481   |
| 14408                                                                                                                                   | ORF1ab | Pol          | P314L        | 1.134810112 | 0.28954804    | 3.362942035   |
| 14676                                                                                                                                   | ORF1ab | Pol          | silent_14676 | 109.7614966 | 45.63516585   | 246.1947389   |
| 15096                                                                                                                                   | ORF1ab | Pol          | silent_15096 | 3.313638366 | 2.217624188   | 4.739897476   |
| 15279                                                                                                                                   | ORF1ab | Pol          | silent_15279 | 115.9570956 | 47.17087253   | 265.8400144   |
| 15451                                                                                                                                   | ORF1ab | Pol          | G662S        | 1.133060367 | 0.038575826   | 4.637501271   |
| 15720                                                                                                                                   | ORF1ab | Pol          | silent_15720 | 1.172269071 | 0.633649636   | 1.961727723   |
| 16176                                                                                                                                   | ORF1ab | Pol          | silent_16176 | 110.7732772 | 46.97063918   | 249.2621181   |
| 16466                                                                                                                                   | ORF1ab | Hel          | P1000L       | 1.40915858  | 0.044026383   | 6.562087234   |
| 16500                                                                                                                                   | ORF1ab | Hel          | Q1011H       | 0.042241921 | 0.004966006   | 0.119555099   |
| 17615                                                                                                                                   | ORF1ab | Hel          | K1383R       | 2.668176659 | 1.684643474   | 3.981633884   |
| 18424                                                                                                                                   | ORF1ab | ExoN         | N1653D       | 0.088805381 | 0.017502498   | 0.220156691   |
| 19220                                                                                                                                   | ORF1ab | ExoN         | A1918V       | 2.600179593 | 0.05024288    | 14.60980137   |
| 20262                                                                                                                                   | ORF1ab | Nsp15        | silent_20262 | 0.040271351 | 0.004729179   | 0.114342534   |
| 21304                                                                                                                                   | ORF1ab | Nsp16        | R2613C       | 0.095418551 | 0.01902739    | 0.236078236   |
| 21575                                                                                                                                   | S      | Spike        | L5F          | 0.261751089 | 0.138095842   | 0.429562623   |
| 21618                                                                                                                                   | S      | Spike        | T19R         | 1.425454145 | 0.044362857   | 6.7160796     |
| 21765                                                                                                                                   | S      | Spike        | del_6_21765  | 204.9412887 | 65.24688523   | 580.7747042   |
| 21846                                                                                                                                   | S      | Spike        | T95I         | 0.042753581 | 0.005183494   | 0.118482277   |
| 21991                                                                                                                                   | S      | Spike        | del_3_21991  | 96.47930698 | 38.60205317   | 229.9342997   |
| 22029                                                                                                                                   | S      | Spike        | del_6_22029  | 1.440010864 | 0.042670578   | 6.753640322   |
| 22320                                                                                                                                   | S      | Spike        | D253G        | 0.021573446 | 0.000526542   | 0.081117114   |
| 22917                                                                                                                                   | S      | Spike        | L452R        | 0.093474175 | 0.00243089    | 0.353395493   |
| 22995                                                                                                                                   | S      | Spike        | T478K        | 0.187514137 | 0.004332081   | 0.727596349   |
| 23012                                                                                                                                   | S      | Spike        | E484K        | 0.073844955 | 0.02014935    | 0.161731114   |
| 23063                                                                                                                                   | S      | Spike        | N501Y        | 84.08236256 | 36.80762043   | 181.2479778   |
| 23271                                                                                                                                   | S      | Spike        | A570D        | 92.63852536 | 41.18301281   | 200.9122891   |
| 23403                                                                                                                                   | S      | Spike        | D614G        | 10.21568067 | 0.105689761   | 22.12066297   |
| 23604                                                                                                                                   | S      | Spike        | P681H        | 36.89190094 | 17.32144956   | 76.33502148   |
| 23604                                                                                                                                   | S      | Spike        | P681R        | 1.076884534 | 0.034973012   | 4.300776899   |
| 23664                                                                                                                                   | S      | Spike        | A701V        | 0.053880834 | 0.006563377   | 0.150664787   |
| 23709                                                                                                                                   | S      | Spike        | T716I        | 68.82004724 | 30.51037793   | 146.3798711   |
| 24410                                                                                                                                   | S      | Spike        | D950N        | 1.114349025 | 0.031995039   | 4.578417908   |
| 24506                                                                                                                                   | S      | Spike        | S982A        | 94.4398387  | 41.13394376   | 204.9617562   |
| 24914                                                                                                                                   | S      | Spike        | D1118H       | 92.83796364 | 40.71247625   | 201.2832695   |
| 26528                                                                                                                                   | M      | Membrane     | silent_26528 | 2.56971927  | 1.220105429   | 4.65120653    |
| 26604                                                                                                                                   | M      | Membrane     | F28L         | 0.161190261 | 0.003808663   | 0.614969257   |
| 26767                                                                                                                                   | M      | Membrane     | I82T         | 0.43257257  | 0.085540329   | 1.043335024   |
| 28280                                                                                                                                   | N      | Nucleocapsid | D3L          | 110.4411058 | 45.52449224   | 248.9833403   |
| 28461                                                                                                                                   | N      | Nucleocapsid | D63G         | 1.42730005  | 0.044005276   | 6.560967987   |
| 28472                                                                                                                                   | N      | Nucleocapsid | P67S         | 0.090380236 | 0.018405603   | 0.221696127   |
| 28854                                                                                                                                   | N      | Nucleocapsid | S194L        | 0.057227229 | 0.001379343   | 0.216422501   |
| 28869                                                                                                                                   | N      | Nucleocapsid | P199L        | 0.048984571 | 0.013281455   | 0.108990337   |
| 28881                                                                                                                                   | N      | Nucleocapsid | R203K        | 32.80411121 | 16.56337894   | 62.80766322   |
| 28881                                                                                                                                   | N      | Nucleocapsid | R203M        | 1.369070102 | 0.039930912   | 6.38380742    |
| 28883                                                                                                                                   | N      | Nucleocapsid | G204R        | 32.7432095  | 16.45693171   | 62.39642202   |
| 28887                                                                                                                                   | N      | Nucleocapsid | T205I        | 0.156118675 | 0.040621359   | 0.347168753   |
| 28916                                                                                                                                   | N      | Nucleocapsid | G215C        | 2.526033886 | 0.047128757   | 13.86076845   |
| 28975                                                                                                                                   | N      | Nucleocapsid | M234I        | 0.019806226 | 0.000501329   | 0.074522047   |
| 28977                                                                                                                                   | N      | Nucleocapsid | S235F        | 71.99219236 | 34.41151267   | 143.6599875   |
| 29272                                                                                                                                   | N      | Nucleocapsid | silent_29272 | 3.276020462 | 2.143577196   | 4.777103474   |
| 29402                                                                                                                                   | N      | Nucleocapsid | D377Y        | 0.055489245 | 0.00147683    | 0.207724496   |
