# Supplementary material for: SARS-CoV-2 Variants Associated with Vaccine Breakthrough in the Delaware Valley through Summer 2021
Source: PubMed Central journal article supplement (PMC8942461; doi:10.1128/mbio.03788-21), 2022-02-08
Supplement: mbio.03788-21-st007.pdf [file mbio.03788-21-st007.pdf]

Table S7

Estimated fold enrichment in odds of appearing in the vaccine breakthrough samples for each substitution or deletion studied.

| Genomic Position | Gene   | Protein      | Mutation     | Mean      | Lower 95% CrI | Upper 95% CrI |
|------------------|--------|--------------|--------------|-----------|---------------|---------------|
| 820              | ORF1ab | Nsp2         | silent_820   | 0.810724  | 0.425987922   | 1.311655448   |
| 913              | ORF1ab | Nsp2         | silent_913   | 1.5855022 | 1.018622732   | 2.398031376   |
| 1059             | ORF1ab | Nsp2         | T265I        | 0.4762545 | 0.265890738   | 0.765807108   |
| 2110             | ORF1ab | Nsp2         | silent_2110  | 1.2810869 | 0.777396644   | 2.001655539   |
| 3037             | ORF1ab | Nsp3         | silent_3037  | 6.1248042 | 0.090070614   | 20.91676927   |
| 3267             | ORF1ab | Nsp3         | T1001I       | 1.5191445 | 0.987066153   | 2.279995511   |
| 4181             | ORF1ab | Nsp3         | A1306S       | 1.0448252 | 0.565388723   | 1.8055564     |
| 5388             | ORF1ab | Nsp3         | A1708D       | 1.4595427 | 0.961071014   | 2.166247955   |
| 5986             | ORF1ab | Nsp3         | silent_5986  | 1.5370474 | 1.001099921   | 2.283418664   |
| 6402             | ORF1ab | Nsp3         | P2046L       | 1.0326591 | 0.550010869   | 1.804972135   |
| 6954             | ORF1ab | Nsp3         | I2230T       | 1.5363607 | 0.995722314   | 2.306073715   |
| 7042             | ORF1ab | Nsp3         | M2259I       | 1.3250678 | 0.690644694   | 2.30880471    |
| 7124             | ORF1ab | Nsp3         | P2287S       | 0.965431  | 0.517040839   | 1.652767609   |
| 8986             | ORF1ab | Nsp4         | silent_8986  | 1.0406789 | 0.55399617    | 1.814140772   |
| 9053             | ORF1ab | Nsp4         | V2930L       | 1.0481489 | 0.561659857   | 1.839947282   |
| 9867             | ORF1ab | Nsp4         | L3201P       | 0.5355704 | 0.271296197   | 0.89092041    |
| 9891             | ORF1ab | Nsp4         | A3209V       | 1.1091302 | 0.620655862   | 1.819869618   |
| 10029            | ORF1ab | Nsp4         | T3255I       | 0.986886  | 0.58630171    | 1.546189381   |
| 10319            | ORF1ab | 3CL-PRO      | L3352F       | 0.8251902 | 0.300257812   | 1.60285745    |
| 11201            | ORF1ab | Nsp6         | T3646A       | 1.1376408 | 0.612731638   | 2.006846346   |
| 11288            | ORF1ab | Nsp6         | del_9_11288  | 1.0468665 | 0.62645507    | 1.684079573   |
| 11332            | ORF1ab | Nsp6         | silent_11332 | 1.1348329 | 0.606839189   | 2.022338997   |
| 14120            | ORF1ab | Pol          | P218L        | 1.3328722 | 0.796418115   | 2.103012451   |
| 14408            | ORF1ab | Pol          | P314L        | 11.001201 | 0.484817413   | 45.88241582   |
| 14676            | ORF1ab | Pol          | silent_14676 | 1.5661209 | 1.010222617   | 2.35567343    |
| 15096            | ORF1ab | Pol          | silent_15096 | 0.8886217 | 0.510374108   | 1.367321013   |
| 15279            | ORF1ab | Pol          | silent_15279 | 1.5886246 | 1.023686527   | 2.401323285   |
| 15451            | ORF1ab | Pol          | G662S        | 1.8370109 | 0.722620381   | 4.252488304   |
| 15720            | ORF1ab | Pol          | silent_15720 | 1.5517575 | 0.849932487   | 2.59464604    |
| 16176            | ORF1ab | Pol          | silent_16176 | 1.5279447 | 0.994220928   | 2.284724616   |
| 16466            | ORF1ab | Hel          | P1000L       | 1.9453037 | 0.744274959   | 4.574104139   |
| 16500            | ORF1ab | Hel          | Q1011H       | 0.5603368 | 0.270820586   | 0.963896113   |
| 17615            | ORF1ab | Hel          | K1383R       | 1.4479914 | 0.832989251   | 2.355733499   |
| 18424            | ORF1ab | ExoN         | N1653D       | 0.6179103 | 0.164504149   | 1.316682584   |
| 19220            | ORF1ab | ExoN         | A1918V       | 1.0356321 | 0.548354144   | 1.819620733   |
| 20262            | ORF1ab | Nsp15        | silent_20262 | 0.5942825 | 0.311339814   | 0.979988783   |
| 21304            | ORF1ab | Nsp16        | R2613C       | 0.479472  | 0.096327986   | 1.127566379   |
| 21575            | S      | Spike        | L5F          | 0.6635113 | 0.361682064   | 1.057407589   |
| 21618            | S      | Spike        | T19R         | 1.4662188 | 0.49911954    | 3.641652632   |
| 21765            | S      | Spike        | del_6_21765  | 1.5175732 | 0.984938631   | 2.27113005    |
| 21846            | S      | Spike        | T95I         | 0.8368207 | 0.519596275   | 1.226270998   |
| 21991            | S      | Spike        | del_3_21991  | 1.384252  | 0.911332839   | 2.075324262   |
| 22029            | S      | Spike        | del_6_22029  | 1.0379389 | 0.415294229   | 2.222463047   |
| 22320            | S      | Spike        | D253G        | 0.5021113 | 0.231594124   | 0.88737621    |
| 22917            | S      | Spike        | L452R        | 1.2812442 | 0.66477337    | 2.269998708   |
| 22995            | S      | Spike        | T478K        | 1.5155461 | 0.666514971   | 3.084620934   |
| 23012            | S      | Spike        | E484K        | 0.9329095 | 0.566306197   | 1.393814533   |
| 23063            | S      | Spike        | N501Y        | 2.0367664 | 1.250733322   | 3.176850638   |
| 23271            | S      | Spike        | A570D        | 1.5162158 | 0.986862281   | 2.266557851   |
| 23403            | S      | Spike        | D614G        | 5.6304256 | 0.111328207   | 20.08100693   |
| 23604            | S      | Spike        | P681H        | 1.5102386 | 0.98334628    | 2.260187547   |
| 23604            | S      | Spike        | P681R        | 2.2460476 | 0.734998695   | 5.611445632   |
| 23664            | S      | Spike        | A701V        | 0.5914999 | 0.256206344   | 1.057296411   |
| 23709            | S      | Spike        | T716I        | 1.4381836 | 0.945564293   | 2.134299568   |
| 24410            | S      | Spike        | D950N        | 2.2638617 | 0.93667791    | 4.593211471   |
| 24506            | S      | Spike        | S982A        | 1.5099331 | 0.975373497   | 2.272288423   |
| 24914            | S      | Spike        | D1118H       | 1.557453  | 1.011756133   | 2.330004327   |
| 26528            | M      | Membrane     | silent_26528 | 1.2827955 | 0.52386102    | 2.578098721   |
| 26604            | M      | Membrane     | F28L         | 2.2795709 | 0.445633619   | 7.213825822   |
| 26767            | M      | Membrane     | I82T         | 1.5711841 | 0.579970146   | 3.631962356   |
| 28280            | N      | Nucleocapsid | D3L          | 1.5841987 | 1.027720398   | 2.362042429   |
| 28461            | N      | Nucleocapsid | D63G         | 2.1535127 | 0.743873945   | 5.40271886    |
| 28472            | N      | Nucleocapsid | P67S         | 0.4678794 | 0.093415366   | 1.094718233   |
| 28854            | N      | Nucleocapsid | S194L        | 1.8241307 | 0.688697864   | 3.959481799   |
| 28869            | N      | Nucleocapsid | P199L        | 0.5017679 | 0.237226567   | 0.884768221   |
| 28881            | N      | Nucleocapsid | R203K        | 1.6064923 | 1.023526664   | 2.446534831   |
| 28881            | N      | Nucleocapsid | R203M        | 1.8875704 | 0.655434986   | 4.729497058   |
| 28883            | N      | Nucleocapsid | G204R        | 1.608691  | 1.024788616   | 2.446987963   |
| 28887            | N      | Nucleocapsid | T205I        | 0.6628609 | 0.254953495   | 1.207525664   |
| 28916            | N      | Nucleocapsid | G215C        | 0.9917648 | 0.530103627   | 1.71744875    |
| 28975            | N      | Nucleocapsid | M234I        | 0.6807963 | 0.347737916   | 1.113327871   |
| 28977            | N      | Nucleocapsid | S235F        | 1.4973654 | 0.978075393   | 2.247171563   |
| 29272            | N      | Nucleocapsid | silent_29272 | 0.9052396 | 0.498282598   | 1.42615733    |
| 29402            | N      | Nucleocapsid | D377Y        | 0.947974  | 0.401135827   | 1.805529482   |
