# Supplementary material for: SARS-CoV-2 Variants Associated with Vaccine Breakthrough in the Delaware Valley through Summer 2021
Source: PubMed Central journal article supplement (PMC8942461; doi:10.1128/mbio.03788-21), 2022-02-08
Supplement: mbio.03788-21-st008.pdf [file mbio.03788-21-st008.pdf]

## TableS8

**Reagent or Resource**

QIAmp 96 Viral RNA Kit  
 SuperScript III RT  
 SS III First Strand 5x Buffer  
 Random Hexamers  
 Dithiothreitol  
 Molecular Grade Water  
 Deoxynucleotide Mix  
 ARTIC Primer Pool 1  
 ARTIC Primer Pool 2  
 Q5 Hot Start Polymerase  
 Q5 5x Reaction Buffer  
 AMPure XP  
 Qubit™ 1X dsDNA Kit  
 Quant-iT PicoGreen Kit  
 IDT for Illumina DNA/RNA  
 UD Indexes A-D

Nextera XT DNA Library Preparation Kit  
 NextSeq 500/550 Mid Output Kit v2.5 (150 Cycles)

**Key reagents****Source**

Qiagen, Hilden, Germany  
 Thermo Fisher Scientific, Waltham, USA  
 New England Biolabs, Ipswich, USA  
 Integrated DNA Technologies, Coralville, USA  
 Integrated DNA Technologies, Coralville, USA  
 New England Biolabs, Ipswich, USA  
 New England Biolabs, Ipswich, USA  
 Beckman Coulter, Brea, USA  
 Invitrogen Corp., Waltham, USA  
 Invitrogen Corp., Waltham, USA  
 Illumina Inc., San Diego, USA

**Identifier**

5262  
 56575  
 Y02321  
 51709  
 Y00122  
 Y01138  
 N0447S  
 100006786  
 100006787  
 M0493L  
 B90275  
 A63882  
 Q33230  
 P7589  
 20027213  
 20027214  
 20027215  
 20027216  
 FC-131-1096  
 20024904
